# Supplementary material for: Banking or Bankrupting: Strategies for Sustaining the Economic Future of Public Cord Blood Banks
Source: PubMed Central journal article supplement (PMC4666404; doi:10.1371/journal.pone.0143440), 2015-12-01
Supplement: pone.0143440.s001.pdf [file pone.0143440.s001.pdf]

**S1 TABLE: DISTRIBUTION OF CBU<sub>s</sub>**

|                       | TOTAL     |               | RELEASED nationally |               |             | RELEASED internationally |               |             |
|-----------------------|-----------|---------------|---------------------|---------------|-------------|--------------------------|---------------|-------------|
|                       | Caucasian | Non Caucasian | Caucasian           | Non Caucasian | Total       | Caucasian                | Non Caucasian | Total       |
| DRESDEN<br>(n=4,074)  | 3,235     | 839           | 0                   | 0             | 0 (0.0%)    | 20                       | 5             | 25 (100.0%) |
| DUKE<br>(n=3,750)     | 2,067     | 1,683         | 100                 | 64            | 164 (77.7%) | 28                       | 19            | 47 (22.3%)  |
| St LOUIS<br>(n=1,397) | 663       | 734           | 11                  | 12            | 23 (53.5%)  | 8                        | 12            | 20 (46.5%)  |
| MARSEILLE<br>(n=175)  | 64        | 111           | 1                   | 2             | 3 (60.0%)   | 0                        | 2             | 2 (40.0%)   |
